# Supplementary material for: A corn stalk-derived porous carbonaceous adsorbent for adsorption of ionic liquids from aqueous solution
Source: Royal Society of Chemistry journal article supplement (doi:10.1039/c6ra06908h), 2016-01-01
Supplement: c6ra06908h1.pdf [file c6ra06908h1.pdf]

## Corn stalk-derived porous carbonaceous adsorbent for adsorption of ionic liquids from aqueous solution

Yu Wang<sup>a,b</sup>, Feng Shen<sup>a</sup>, Xinhua Qi<sup>a,\*</sup> □

<sup>a</sup>Agro-Environmental Protection Institute, Chinese Academy of Agricultural Sciences, The Ministry of Agriculture, No. 31, Fukang Road, Nankai District, Tianjin 300191, China

<sup>b</sup> College of Environmental Science & Engineering, Nankai University, Tianjin 300071, China

**Table S1.** Structural characteristics and properties of activated carbons derived from corn stalk

according to preparation conditions of activation temperature and weight ratio of KOH to

hydrochar (KOH:HC).

| Sample       | Temperature<br>e<br>(°C) | KOH/HC<br>ratio | S <sub>BET</sub> <sup>a</sup><br>(m <sup>2</sup> /g) | S <sub>micro</sub><br>(m <sup>2</sup> /g) | V <sub>t</sub> <sup>b</sup><br>(cm <sup>3</sup> /g) | V <sub>0</sub> <sup>c</sup><br>(cm <sup>3</sup> /g) |
|--------------|--------------------------|-----------------|------------------------------------------------------|-------------------------------------------|-----------------------------------------------------|-----------------------------------------------------|
| CSCM-600-2-2 | 600                      | 2               | 955                                                  | 788                                       | 0.43                                                | 0.31                                                |
| CSCM-700-2-2 | 700                      | 2               | 1539                                                 | 1232                                      | 0.72                                                | 0.48                                                |
| CSCM-800-2-2 | 800                      | 2               | 2442                                                 | 2149                                      | 1.56                                                | 0.86                                                |
| CSCM-900-2-2 | 900                      | 2               | 2225                                                 | 1199                                      | 1.11                                                | 0.49                                                |
| CSCM-800-1-2 | 800                      | 1               | 1543                                                 | 1439                                      | 0.71                                                | 0.61                                                |
| CSCM-800-4-2 | 800                      | 4               | 2170                                                 | 1983                                      | 1.27                                                | 0.66                                                |

<sup>a</sup> Surface area was calculated using the Brunauer-Emmett-Teller method at P/P<sub>0</sub>=0.01-0.1. <sup>b</sup> Total pore volume at P/P<sub>0</sub>=0.99. <sup>c</sup> Total micropore volume was calculated from N<sub>2</sub> adsorption data by t-plot method.

\* Corresponding author. Email: [qixinhua@nankai.edu.cn](mailto:qixinhua@nankai.edu.cn) (X. Qi); Tel (Fax): 86-22-2361-6651.

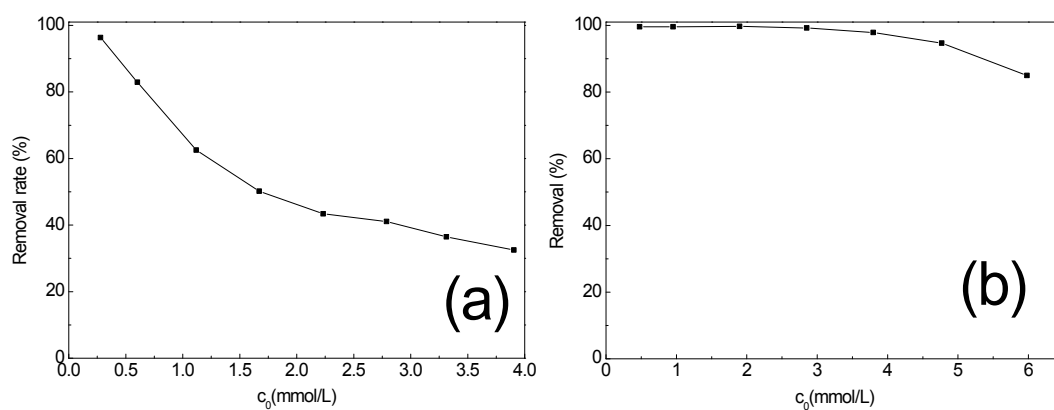

**Figure S1.** The effect of the initial concentration of (a) [Bmim]Cl and (b) [Bmim][NTf<sub>2</sub>] on adsorption removal onto the CSCM adsorbent (adsorption conditions: adsorption temperature, 30 °C; pH = 10).
